# Supplementary material for: 恐怖と憐みのはざまで : ソヴィエト時代における〈原爆文学〉の翻訳をめぐって
Source: Royal Society of Chemistry journal article supplement (doi:10.1039/d3dt01290e), 2011-01-01
Supplement: d3dt01290e1.pdf [file d3dt01290e1.pdf]

Supporting Information for

**Anhydrous copper tellurite-disulfate  $\text{Cu}_3\text{TeO}_3(\text{SO}_4)_2$  featuring coexistence of spin singlets and long-range antiferromagnetic order**

Alisher F. Murtazoev,<sup>a</sup> Peter S. Berdonosov,<sup>b,c</sup> Konstantin A. Lyssenko,<sup>b,g</sup> Valery A. Dolgikh,<sup>b</sup>  
Zlata V. Pchelkina,<sup>d,e</sup> Konstantin V. Zakharov,<sup>f</sup> Michael Y. Geidorf,<sup>c,f</sup> Tatyana M.  
Vasilchikova,<sup>c,f</sup> Olga S. Volkova<sup>c,f</sup> and Alexander N. Vasiliev<sup>c,f,\*</sup>

<sup>a</sup>Faculty of Materials Science, Lomonosov Moscow State University, Moscow 119991, Russia.

<sup>b</sup>Department of Inorganic Chemistry, Lomonosov Moscow State University, Moscow 119991, Russia.

<sup>c</sup>Quantum Functional Materials Laboratory, National University of Science and Technology "MISIS", Moscow 119049, Russia.

<sup>d</sup>Institute of Metal Physics, UB RAS, Ekaterinburg 620990, Russia

<sup>e</sup>Department of Theoretical Physics and Applied Mathematics, Ural Federal University, Ekaterinburg 620002, Russia

<sup>f</sup>Department of Low temperature Physics and superconductivity, Faculty of Physics Lomonosov Moscow State University Moscow 119991, Russia.

<sup>g</sup>G.V. Plekhanov Russian University of Economics, 36 Stremyanny Per., Moscow, 117997, Russian Federation

**Fig. S1.** Comparison of PXRD pattern from prepared  $\text{Cu}_3\text{TeO}_3(\text{SO}_4)_2$  sample (upper panel and calculated one from the single crystal data (lower panel)

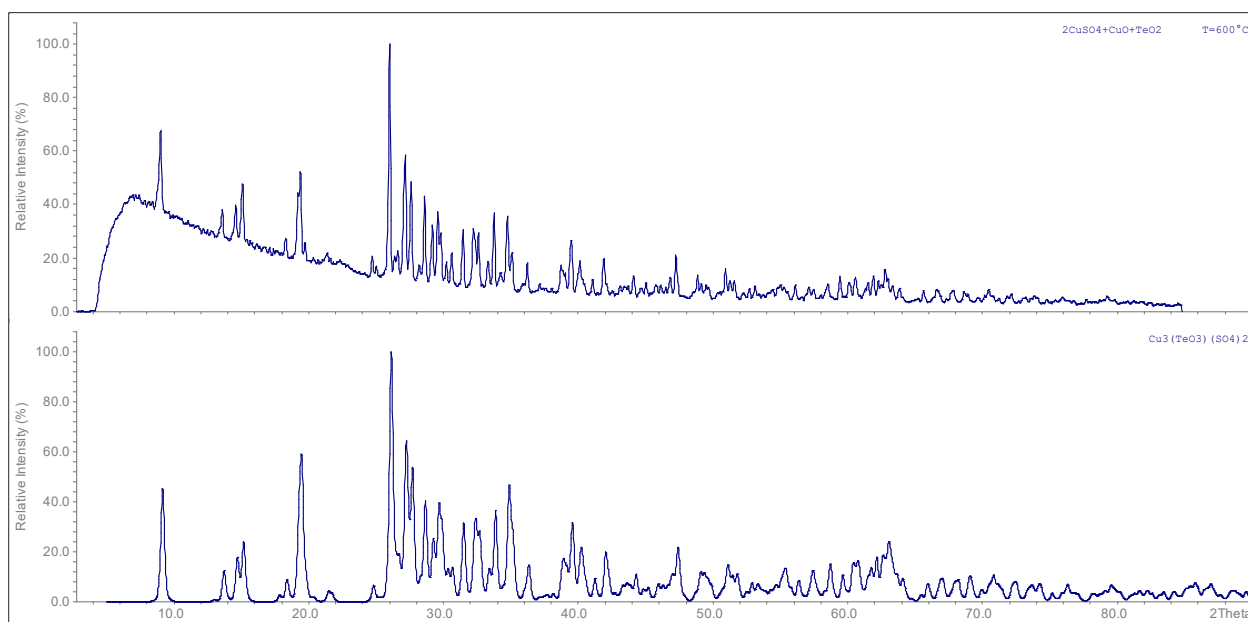

**Table S1.** Atomic coordinates ( $\times 10^4$ ) and equivalent isotropic displacement parameters ( $\text{\AA}^2 \times 10^3$ ) for  $\text{Cu}_3\text{TeO}_3(\text{SO}_4)_2$ .  $U(\text{eq})$  is defined as one third of the trace of the orthogonalized  $U_{ij}$  tensor

| Atom  | x       | y       | z       | $U(\text{eq})$ |
|-------|---------|---------|---------|----------------|
| Te(1) | 3076(1) | 7121(1) | 6405(1) | 8(1)           |
| Cu(1) | 8456(1) | 8242(1) | 5393(1) | 9(1)           |
| Cu(2) | 5882(1) | 8482(1) | 3040(1) | 10(1)          |

|       |         |         |         |       |
|-------|---------|---------|---------|-------|
| Cu(3) | 2891(1) | 7701(1) | -510(1) | 9(1)  |
| S(1)  | 1781(1) | 6178(1) | 2912(1) | 9(1)  |
| S(2)  | 7484(1) | 7370(1) | 186(1)  | 8(1)  |
| O(1)  | 3663(4) | 8685(3) | 7453(2) | 10(1) |
| O(2)  | 1287(4) | 8945(3) | 5527(2) | 11(1) |
| O(3)  | 5690(3) | 7958(3) | 4989(2) | 10(1) |
| O(4)  | 3579(4) | 6453(3) | 3546(2) | 11(1) |
| O(5)  | 1726(4) | 4067(3) | 2992(2) | 12(1) |
| O(6)  | -343(4) | 6753(3) | 3691(2) | 13(1) |
| O(7)  | 2261(4) | 7344(3) | 1472(2) | 11(1) |
| O(8)  | 6850(4) | 5355(3) | 998(2)  | 12(1) |
| O(9)  | 7240(4) | 8665(3) | 1137(2) | 11(1) |
| O(10) | 9807(4) | 7546(3) | -649(2) | 13(1) |
| O(11) | 6073(4) | 8122(3) | -773(2) | 12(1) |

**Table S2.** Anisotropic displacement parameters ( $\text{\AA}^2 \times 10^3$ ) for  $\text{Cu}_3\text{TeO}_3(\text{SO}_4)_2$ . The anisotropic displacement factor exponent takes the form:  $-2p^2 [h^2 a^* U^{11} + \dots + 2hk a^* b^* U^{12}]$

| Atom  | U <sup>11</sup> | U <sup>22</sup> | U <sup>33</sup> | U <sup>23</sup> | U <sup>13</sup> | U <sup>12</sup> |
|-------|-----------------|-----------------|-----------------|-----------------|-----------------|-----------------|
| Te(1) | 8(1)            | 8(1)            | 8(1)            | -2(1)           | -2(1)           | 0(1)            |
| Cu(1) | 8(1)            | 8(1)            | 11(1)           | -2(1)           | -4(1)           | -1(1)           |
| Cu(2) | 14(1)           | 10(1)           | 7(1)            | -3(1)           | -2(1)           | -3(1)           |
| Cu(3) | 8(1)            | 11(1)           | 7(1)            | -2(1)           | -2(1)           | 0(1)            |
| S(1)  | 9(1)            | 9(1)            | 8(1)            | -2(1)           | -1(1)           | -1(1)           |
| S(2)  | 8(1)            | 9(1)            | 8(1)            | -3(1)           | -2(1)           | 1(1)            |
| O(1)  | 12(1)           | 9(1)            | 10(1)           | -3(1)           | -3(1)           | -1(1)           |
| O(2)  | 10(1)           | 8(1)            | 15(1)           | 0(1)            | -7(1)           | 0(1)            |
| O(3)  | 9(1)            | 12(1)           | 8(1)            | -2(1)           | -2(1)           | 0(1)            |
| O(4)  | 13(1)           | 10(1)           | 9(1)            | 0(1)            | -4(1)           | -4(1)           |
| O(5)  | 14(1)           | 9(1)            | 13(1)           | -2(1)           | -6(1)           | -1(1)           |
| O(6)  | 10(1)           | 16(1)           | 12(1)           | -5(1)           | 0(1)            | 0(1)            |
| O(7)  | 13(1)           | 11(1)           | 7(1)            | 0(1)            | -2(1)           | 0(1)            |
| O(8)  | 15(1)           | 8(1)            | 12(1)           | -2(1)           | -3(1)           | 0(1)            |
| O(9)  | 14(1)           | 10(1)           | 11(1)           | -5(1)           | -2(1)           | -2(1)           |
| O(10) | 9(1)            | 18(1)           | 12(1)           | -7(1)           | -2(1)           | 2(1)            |
| O(11) | 10(1)           | 15(1)           | 10(1)           | -2(1)           | -4(1)           | 1(1)            |
